# Supplementary material for: Optical enhancement of highly efficient organic–inorganic oxyfluoride red phosphors via the cation co-doping strategy
Source: Royal Society of Chemistry journal article supplement (doi:10.1039/d3dt01860a), 2023-01-01
Supplement: d3dt01860a1.pdf [file d3dt01860a1.pdf]

## Electronic Supplementary Information (ESI)

# Optical enhancement of the highly-efficient organic-inorganic oxyfluoride red phosphor via cation co-doping strategy

Xiaoyi Liu<sup>a,b</sup>, Haiming Cheng<sup>c</sup>, Hu Wang<sup>b</sup>, Zhu Wen<sup>b</sup>, Guixia Liu<sup>\*a,b</sup>, Shengda Liu<sup>b</sup>, Dan Li<sup>b</sup>,  
Jinxian Wang<sup>b</sup>, Wensheng Yu<sup>b</sup>, Xiangting Dong<sup>b</sup>

<sup>a</sup>*College of Materials Science and Engineering, Changchun University of Science and Technology, Changchun 130022, China*

<sup>b</sup>*Key Laboratory of Applied Chemistry and Nanotechnology at Universities of Jilin Province, Changchun University of Science and Technology, Changchun 130022, China*

<sup>c</sup>*State Key Laboratory of Inorganic Synthesis and Preparative Chemistry, College of Chemistry Jilin University, Changchun 130012, China.*

*\*Corresponding Author.*

*Tel.: +86-431-85582574. Fax: +86-431-85383815*

*E-mail address: liuguixia22@163.com*

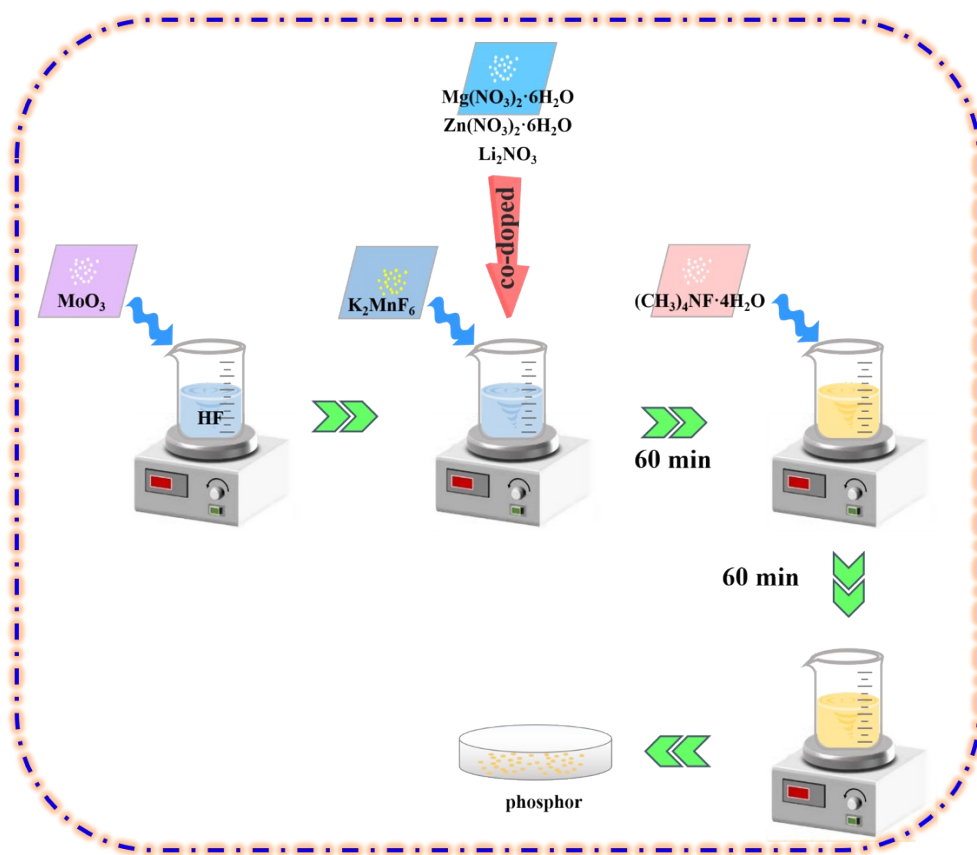

**Fig. S1** Schematic diagram of the synthesis process of  $[\text{N}(\text{CH}_3)_4]_3\text{MoO}_3\text{F}_3:\text{Mn}^{4+}$ ,  $[\text{N}(\text{CH}_3)_4]_4\text{MoO}_3\text{F}_3:\text{Mn}^{4+}$ ,  $\text{Mg}^{2+}$ ,  $[\text{N}(\text{CH}_3)_4]_3\text{MoO}_3\text{F}_3:\text{Mn}^{4+}$ ,  $\text{Zn}^{2+}$  and  $[\text{N}(\text{CH}_3)_4]_3\text{MoO}_3\text{F}_3:\text{Mn}^{4+}$ ,  $\text{Li}^+$ ,

The special  $3d^3$  valence electronic structure of  $Mn^{4+}$  could be well-described by the Tanabe-Sugano energy level diagram, which is shown in **Fig. S2a**. In order to better understand the photoluminescence mechanism of  $[N(CH_3)_4]_3MoO_3F_3:Mn^{4+}$  phosphor, the corresponding crystal field strength ( $D_q$ ) and Racah parameters ( $B$ ,  $C$ ) for  $Mn^{4+}$  occupied the octahedral site were calculated according to the equations (1) - (4) listed as follows [24, 37]:

$$E(^4T_{2g} \rightarrow ^4A_{2g}) = 10D_q \quad (1)$$

$$\frac{B}{D_q} = \frac{\left(\frac{\Delta E}{D_q}\right)^2 - 10\left(\frac{\Delta E}{D_q}\right)}{15\left(\frac{\Delta E}{D_q} - 8\right)} \quad (2)$$

$$\Delta E = E(^4T_{1g}) - E(^4T_{2g}) \quad (3)$$

$$\frac{E(^2E_g)}{B} = \frac{3.05C}{B} + 7.90 - \frac{1.80B}{D_q} \quad (4)$$

In our work, the ZPL energy of the  $^2E_g$  state can be determined easily to be  $16051 \text{ cm}^{-1}$  (624 nm) from the experimental PL spectrum. However, when determining the  $^4T_{2g}$  and  $^4T_{1g}$  energy levels, their strong phonon coupling needs to be considered, because their equilibrium energy levels are not simply given by the peak energy of each PLE band, but by the ZPL energy. For the convenience of calculation,  $E(^4A_{2g} \rightarrow ^4T_{1g})$  and  $E(^4A_{2g} \rightarrow ^4T_{2g})$  are identified as  $27027 \text{ cm}^{-1}$  (370 nm) and  $21277 \text{ cm}^{-1}$  (470 nm) according to the strongest peaks of the absorption spectrum, respectively. Subsequently, crystal field intensity ( $D_q = 2128 \text{ cm}^{-1}$ ), Racah parameters ( $B = 528 \text{ cm}^{-1}$  and  $C = 3964 \text{ cm}^{-1}$ ) were calculated, which believes that the  $[N(CH_3)_4]_3MoO_3F_3$  matrix provides a strong crystal field environment ( $D_q/B = 4.03$ ) for  $Mn^{4+}$ .

Proverbially, the energy level difference of  $^2E_g \rightarrow ^4A_{2g}$  has little relation with the crystal field intensity  $D_q$ , which is mainly determined by nephelauxetic effect. Moreover, the reduction degree of Racah parameters  $B$  and  $C$  parameters varies with different matrix. Therefore,  $\beta_I$  can be calculated according to equation (5) and used to quantitatively describe nephelauxetic effect in  $Mn^{4+}$  ion spectra [24]:

$$\beta_1 = \sqrt{\left(\frac{B}{B_0}\right)^2 + \left(\frac{C}{C_0}\right)^2} \quad (5)$$

Herein,  $B_0 = 1160 \text{ cm}^{-1}$ ,  $C_0 = 4303 \text{ cm}^{-1}$ , so the  $\beta_1$  value of  $\text{Mn}^{4+}$  in  $[\text{N}(\text{CH}_3)_4]_3\text{MoO}_3\text{F}_3$  matrix is calculated to be 1.03. According to the data between  $\beta_1$  value and emission peak energy  $E(^2\text{E}_g \rightarrow ^4\text{A}_{2g})$  in different matrix materials of  $\text{Mn}^{4+}$  (Table S1) [23-36], the  $^2\text{E}_g$  level energy can be expressed as a linear function of  $\beta_1$ ,  $E(^2\text{E}_g) = 18111.57\beta_1 - 2596.03$  (Fig. S2b). When  $\beta_1 = 1.03$ ,  $E(^2\text{E}_g) = 16059 \text{ cm}^{-1}$ , which is close to the experimental value ( $16026 \text{ cm}^{-1}$ ), this linear function can predict the energy position of  $^2\text{E}_g$ . Meanwhile, the emission peak energy of  $\text{Mn}^{4+}$  is close to the reported  $^2\text{E}_g \rightarrow ^4\text{A}_{2g}$  emission peak energies of  $\text{Mn}^{4+}$  in fluoride and oxyfluoride, which demonstrates that the nephelauxetic effect of  $\text{Mn}^{4+}$  ions in the  $[\text{N}(\text{CH}_3)_4]_3\text{MoO}_3\text{F}_3$  matrix is weaker than that in the oxide matrix.

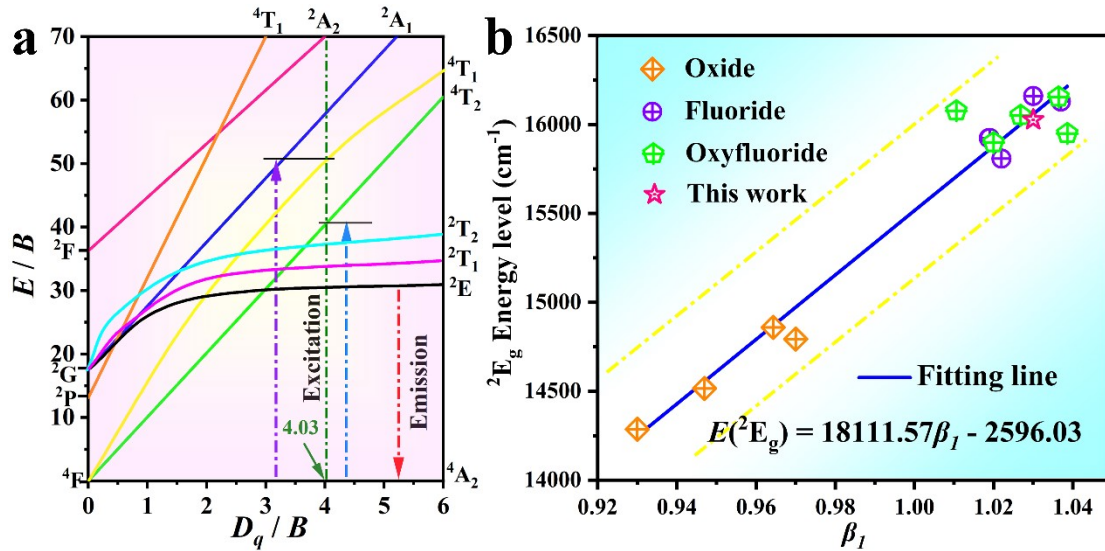

Fig. S2 Tanabe-Sugano energy-level diagram of  $\text{Mn}^{4+}$  in  $[\text{N}(\text{CH}_3)_4]_3\text{MoO}_3\text{F}_3$  host (a), and the relationship (b) between  $E(^2\text{E}_g \rightarrow ^4\text{A}_{2g})$  and  $\beta_1$  of  $\text{Mn}^{4+}$  in different hosts

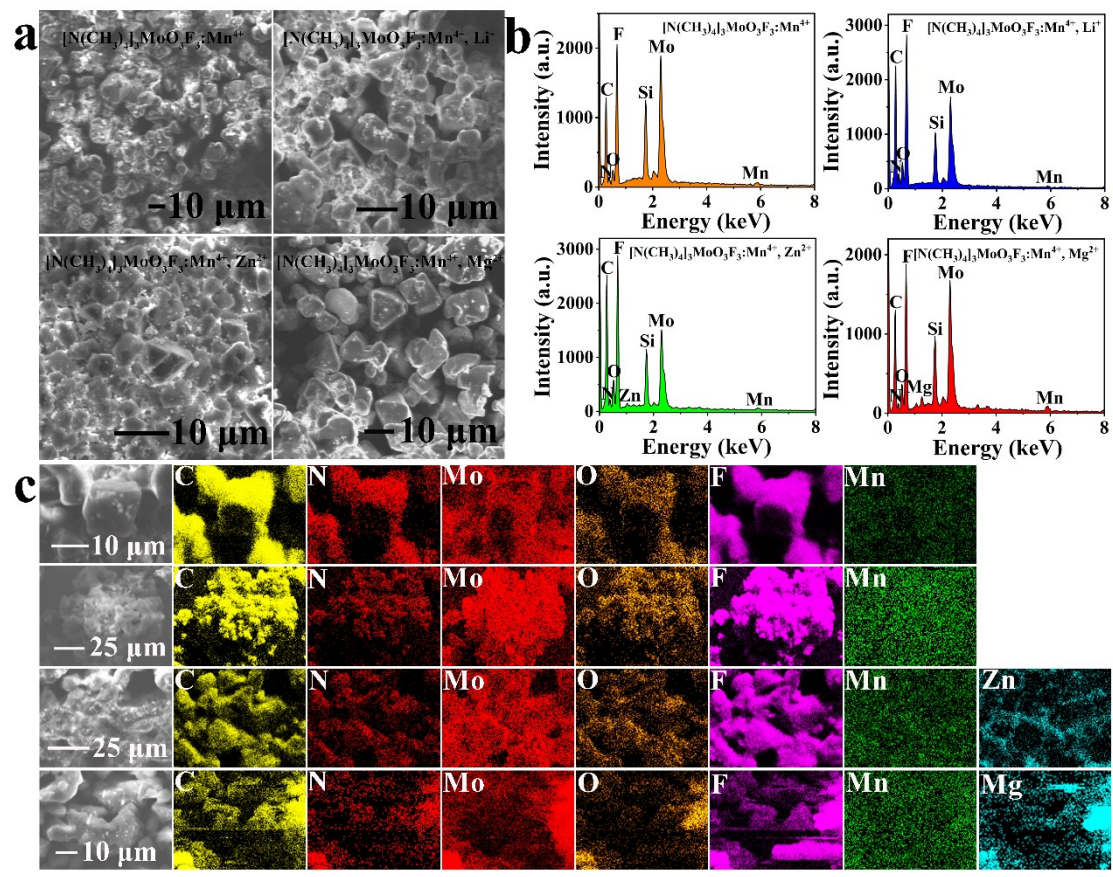

**Fig. S3** SEM images (a) EDS spectra (b) and elemental mapping images (c) of  $[N(CH_3)_4]_3MoO_3F_3$  synthesized by co-doping different cations

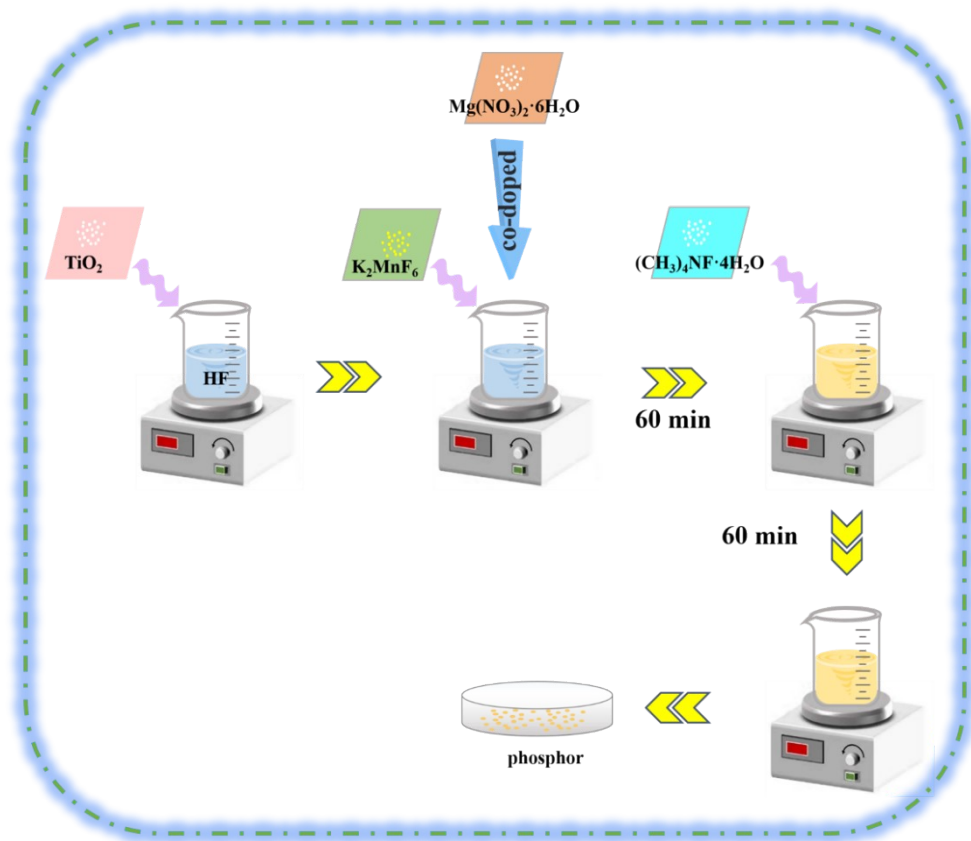

**Fig. S4** Schematic diagram of the synthesis process of  $[\text{N}(\text{CH}_3)_4]_2\text{TiF}_6:\text{Mn}^{4+}$ ,  $[\text{N}(\text{CH}_3)_4]_2\text{TiF}_6:\text{Mn}^{4+}$ ,  $\text{Mg}^{2+}$

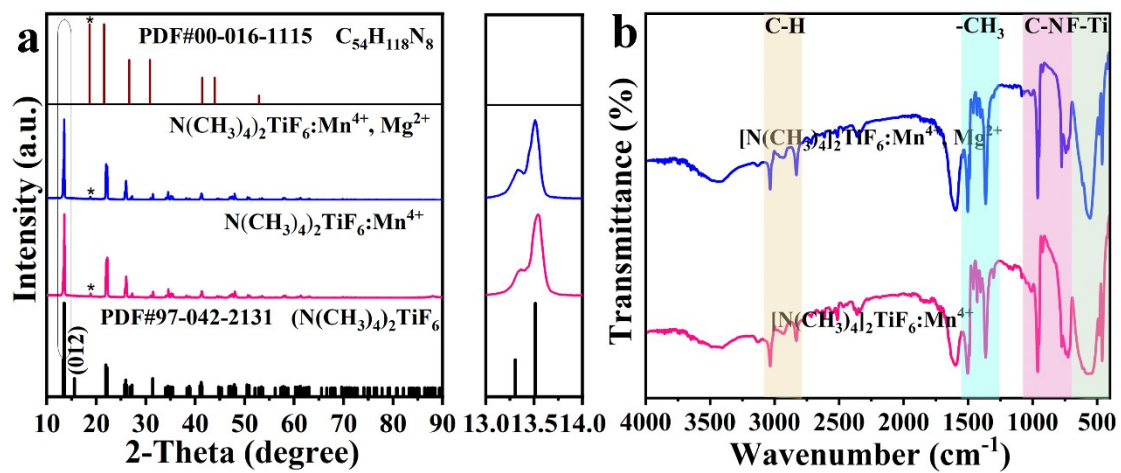

Fig. S5 XRD patterns (a) FT-IR spectra (b) of  $[N(CH_3)_4]_2TiF_6:Mn^{4+}$  and  $[N(CH_3)_4]_2TiF_6:Mn^{4+}, Mg^{2+}$

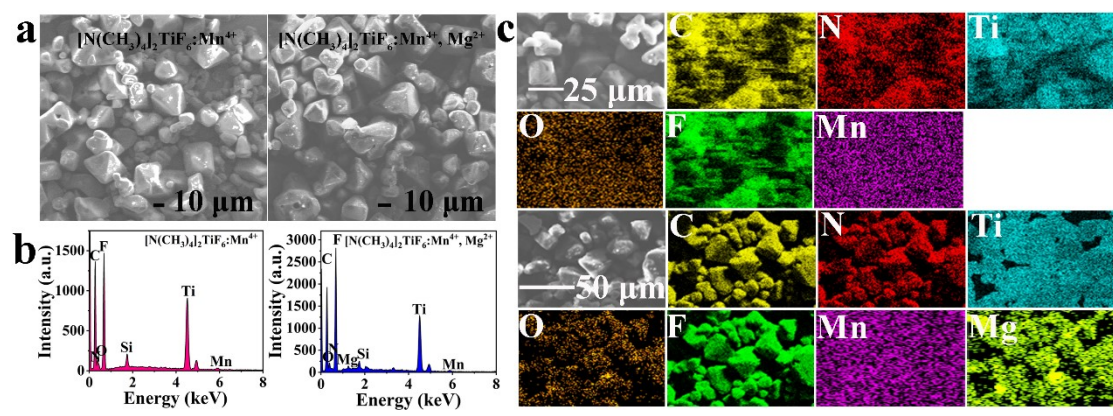

**Fig. S6** SEM images (a), EDS spectra (b) and elemental mapping images (c) of  $[\text{N}(\text{CH}_3)_4]_2\text{TiF}_6 \cdot \text{Mn}^{4+}$  and  $[\text{N}(\text{CH}_3)_4]_2\text{TiF}_6 \cdot \text{Mn}^{4+}, \text{Mg}^{2+}$



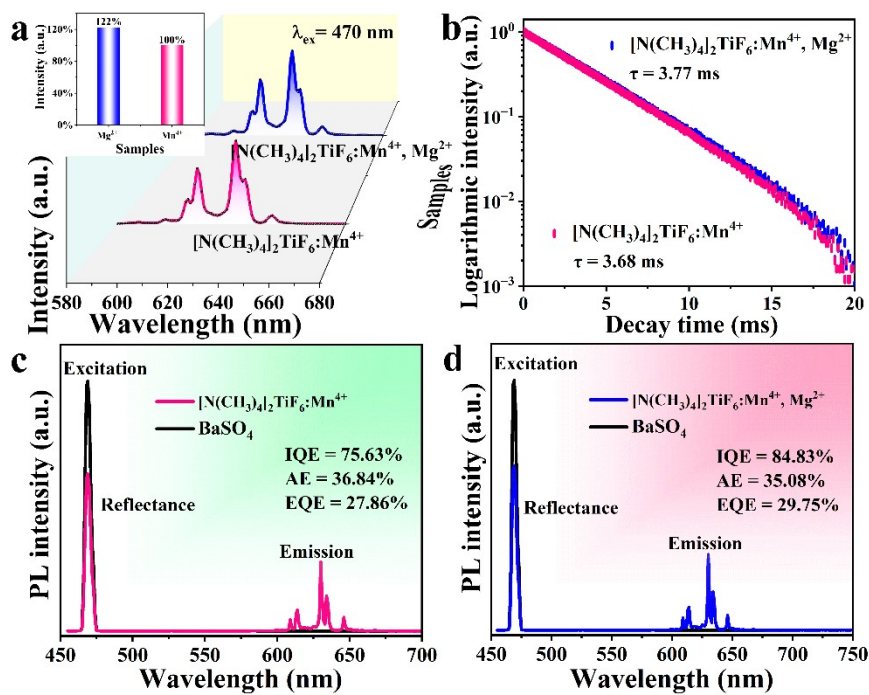

**Fig. S7** Emission spectra and emission intensity histogram (a), decay curves (b), and spectra (c and d) of  $[\text{N}(\text{CH}_3)_4]_2\text{TiF}_6:\text{Mn}^{4+}$  and  $[\text{N}(\text{CH}_3)_4]_2\text{TiF}_6:\text{Mn}^{4+}, \text{Mg}^{2+}$  and the reference sample measured using an integrating sphere for IQE, AE and EQE

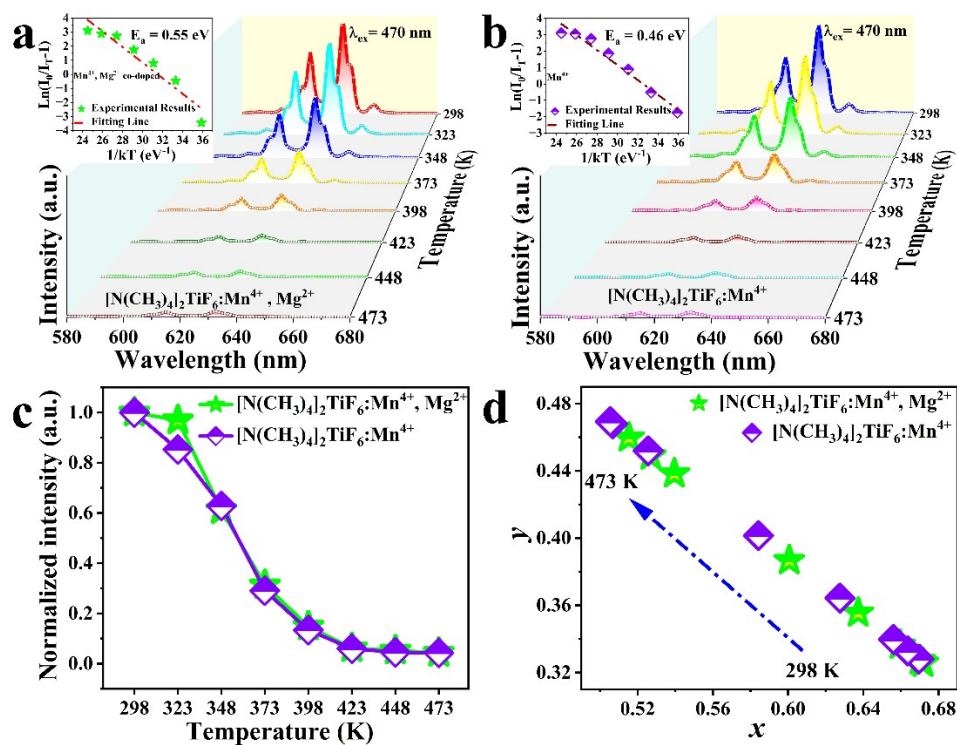

**Fig. S8** Temperature-dependent PL spectra and Arrhenius fitting for different phosphors to deduce the activation energy ( $E_a$ ) (a and b), relative intensity (c) and CIE coordinates at different temperature (d) of  $[\text{N}(\text{CH}_3)_4]_2\text{TiF}_6:\text{Mn}^{4+}$  and  $[\text{N}(\text{CH}_3)_4]_2\text{TiF}_6:\text{Mn}^{4+}, \text{Mg}^{2+}$

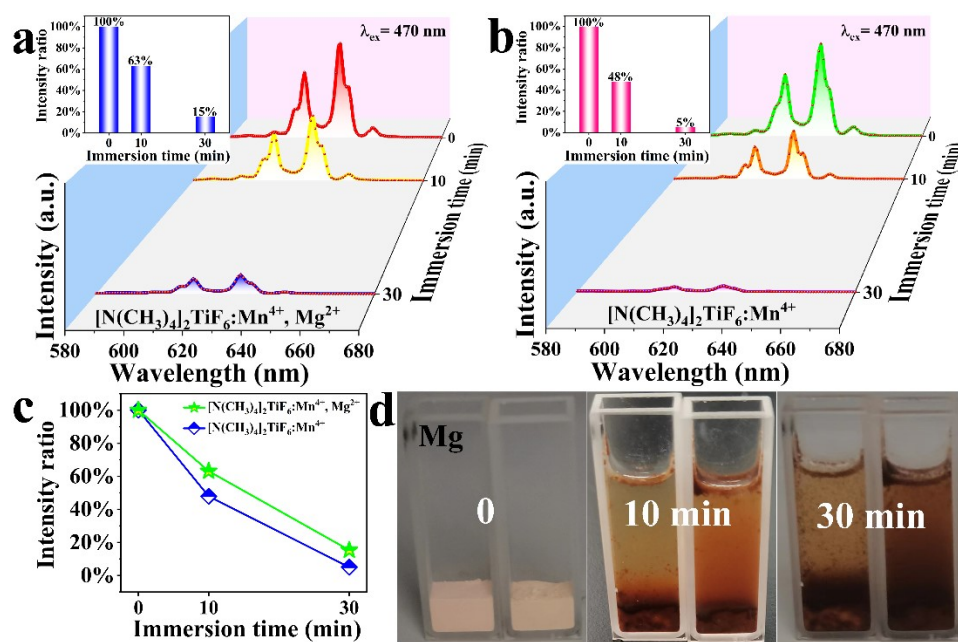

**Fig. S9** Corresponding emission spectra and emission intensity histogram (a and b) of  $[\text{N}(\text{CH}_3)_4]_2\text{TiF}_6:\text{Mn}^{4+}$  and  $[\text{N}(\text{CH}_3)_4]_2\text{TiF}_6:\text{Mn}^{4+}, \text{Mg}^{2+}$  for different immersion times (0, 10 min and 30 min) in deionized water, the changes (c) of PL intensity ratio of these red phosphors at 632 nm with different immersion time and photographs (d) of exposed to natural light

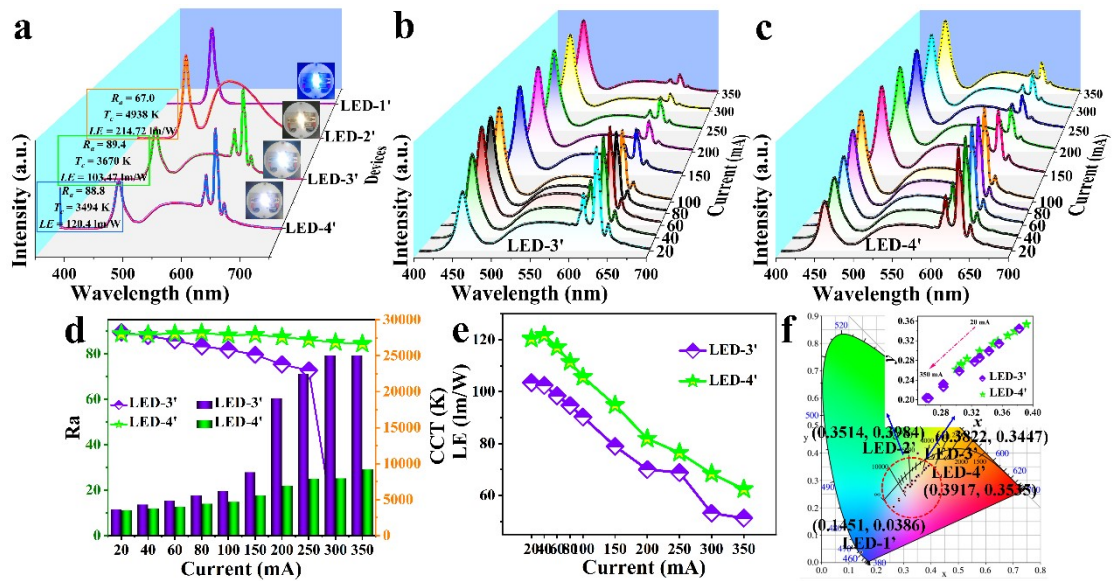

**Fig. S10** Electroluminescence (EL) spectra of LED devices (a), EL spectra (b and c), the changes of CRI and CCT (d), LE (e) and CIE color coordinates (f) under different driving currents (20-350 mA) of the LED-3' and LED-4'

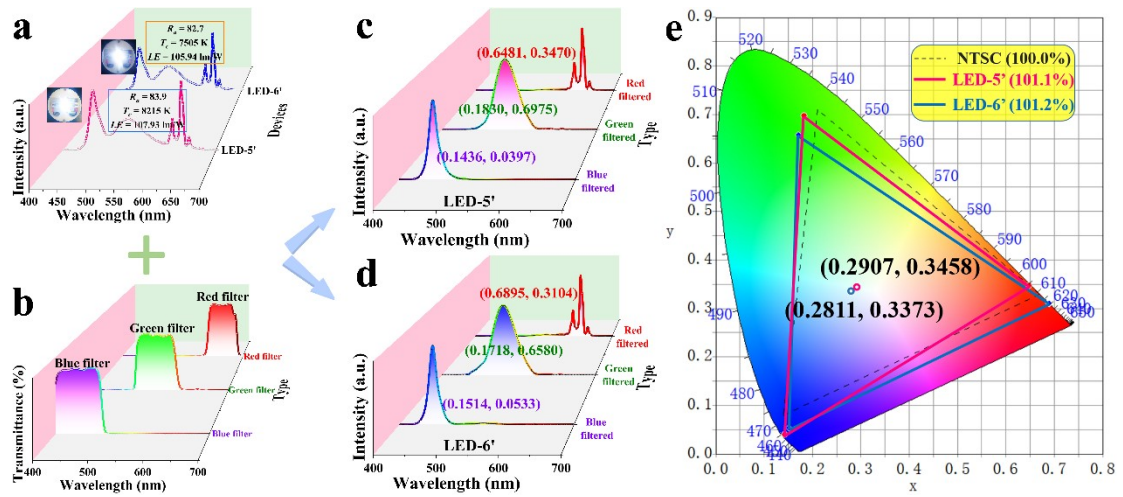

**Fig. S11** EL spectrum (a), transmittance spectra (b) of the commercial blue, green, and red color filters, the corresponding blue, green and red EL spectra after filtering (c and d) and CIE color coordinates (e) of the WLED and the NTSC standard in the CIE 1931 color space

**Table S1.** Schemes of different molecular ratios of chemical reagent for the synthesis of red phosphors

| samples                                  | MoO <sub>3</sub> : K <sub>2</sub> MnF <sub>6</sub><br>(Molar ratio %) | MoO <sub>3</sub> :<br>Mg(NO <sub>3</sub> ) <sub>2</sub> ·6H <sub>2</sub> O/Zn(NO <sub>3</sub> ) <sub>2</sub> ·6H <sub>2</sub> O/LiNO <sub>3</sub><br>(Molar ratio %) |
|------------------------------------------|-----------------------------------------------------------------------|----------------------------------------------------------------------------------------------------------------------------------------------------------------------|
| 2%Mn <sup>4+</sup>                       | 98 : 2                                                                |                                                                                                                                                                      |
| 4%Mn <sup>4+</sup>                       | 96 : 4                                                                |                                                                                                                                                                      |
| 6%Mn <sup>4+</sup>                       | 94 : 6                                                                |                                                                                                                                                                      |
| 8%Mn <sup>4+</sup>                       | 92 : 8                                                                |                                                                                                                                                                      |
| 10%Mn <sup>4+</sup>                      | 90 : 10                                                               |                                                                                                                                                                      |
| 6%Mn <sup>4+</sup> , 10%Mg <sup>2+</sup> | 84 : 6                                                                | 84 : 10                                                                                                                                                              |
| 6%Mn <sup>4+</sup> , 10%Zn <sup>2+</sup> | 84 : 6                                                                | 84 : 10                                                                                                                                                              |
| 6%Mn <sup>4+</sup> , 10%Li <sup>+</sup>  | 84 : 6                                                                | 84 : 10                                                                                                                                                              |

**Table S2** Spectroscopic parameters and  $\beta_1$  values of  $\text{Mn}^{4+}$  ions for as-reported  $\text{Mn}^{4+}$ -activated fluorides, oxyfluorides and oxides phosphor.

| Host                                                            | $D_q/\text{cm}^{-1}$ | $B/\text{cm}^{-1}$ | $D_q/B$ | $C/\text{cm}^{-1}$ | $\beta_1/\text{cm}^{-1}$ | $E(^2E_g) / \text{cm}^{-1}$ | Ref. |
|-----------------------------------------------------------------|----------------------|--------------------|---------|--------------------|--------------------------|-----------------------------|------|
| $\text{Li}_3\text{Na}_3\text{Ga}_2\text{F}_{12}$                | 2146                 | 548                | 3.9     | 3884               | 1.02                     | 15923                       | [23] |
| $\text{Cs}_2\text{NaGaF}_6:\text{Mn}^{4+}$                      | 2137                 | 526                | 4.1     | 3923               | 1.02                     | 15808                       | [24] |
| $\text{K}_2\text{XF}_7(\text{X}=\text{Ta}, \text{Nb})$          | 2166                 | 551                | 3.9     | 3955               | 1.03                     | 16160                       | [25] |
| $\text{Na}_2\text{TiF}_6$                                       | 2100                 | 505                | 4.2     | 4052.6             | 1.04                     | 16129                       | [26] |
| $\text{Na}_3\text{Li}_3\text{In}_2\text{F}_{12}:\text{Mn}^{4+}$ | 2137                 | 549                | 3.9     | 3881               | 1.02                     | 15924                       | [27] |
| $\text{Na}_2\text{WO}_2\text{F}_4$                              | 2132                 | 546                | 3.9     | 3973               | 1.04                     | 16155                       | [28] |
| $\text{K}_2[\text{MoO}_2\text{F}_4]\cdot\text{H}_2\text{O}$     | 2123                 | 510                | 4.2     | 4049               | 1.04                     | 15949                       | [29] |
| $\text{Rb}_2\text{MoO}_2\text{F}_4$                             | 2137                 | 557                | 3.8     | 3905               | 1.03                     | 16051                       | [30] |
| $\text{K}_3\text{WO}_2\text{F}_5\cdot 2\text{H}_2\text{O}$      | 2128                 | 489                | 4.4     | 4061               | 1.03                     | 16051                       | [31] |
| $\text{BaNbF}_{5.5}(\text{OH})_{1.5}$                           | 2128                 | 505                | 4.2     | 3975               | 1.02                     | 15898                       | [32] |
| $\text{Li}_4\text{AlSbO}_6$                                     | 2146                 | 745                | 2.9     | 3095               | 0.96                     | 14859                       | [33] |
| $\text{BaLaLiTe}_{1-x}\text{O}_6$                               | 2123                 | 734                | 2.9     | 2932               | 0.93                     | 14286                       | [34] |
| $\text{Ba}_2\text{CaWO}_6$                                      | 2024                 | 788                | 2.6     | 2989               | 0.97                     | 14793                       | [35] |
| $\text{Ba}_2\text{LaNbO}_6$                                     | 1965                 | 688                | 2.1     | 3175               | 0.947                    | 14684                       | [36] |

**Table S3** Cell parameters of  $[\text{N}(\text{CH}_3)_4]_3\text{MoO}_3\text{F}_3$ ,  $[\text{N}(\text{CH}_3)_4]_3\text{MoO}_3\text{F}_3:\text{Mn}^{4+}$ ,  $[\text{N}(\text{CH}_3)_4]_3\text{MoO}_3\text{F}_3:\text{Mn}^{4+}$ ,  $\text{Mg}^{2+}$ ,  $[\text{N}(\text{CH}_3)_4]_3\text{MoO}_3\text{F}_3:\text{Mn}^{4+}$ ,  $\text{Zn}^{2+}$  and  $[\text{N}(\text{CH}_3)_4]_3\text{MoO}_3\text{F}_3:\text{Mn}^{4+}$ ,  $\text{Li}^+$  phosphors

| Samples                             | Crystalline phase | Space group       | Lattice parameters |                    |
|-------------------------------------|-------------------|-------------------|--------------------|--------------------|
|                                     |                   |                   | a=b=c(Å)           | V(Å <sup>3</sup> ) |
| host                                | Cubic             | <i>Pa</i> -3(205) | 14.1565            | 2837.10            |
| $\text{Mn}^{4+}$                    | Cubic             | <i>Pa</i> -3(205) | 14.1348            | 2824.05            |
| $\text{Mn}^{4+}$ , $\text{Mg}^{2+}$ | cubic             | <i>Pa</i> -3(205) | 14.1772            | 2849.54            |
| $\text{Mn}^{4+}$ , $\text{Zn}^{2+}$ | cubic             | <i>Pa</i> -3(205) | 14.1667            | 2843.19            |
| $\text{Mn}^{4+}$ , $\text{Li}^+$    | cubic             | <i>Pa</i> -3(205) | 14.1494            | 2832.81            |



**Table S4** Cell parameters of  $[\text{N}(\text{CH}_3)_4]_2\text{TiF}_6$ ,  $[\text{N}(\text{CH}_3)_4]_2\text{TiF}_6:\text{Mn}^{4+}$  and  $[\text{N}(\text{CH}_3)_4]_2\text{TiF}_6:\text{Mn}^{4+}, \text{Mg}^{2+}$  phosphors

| <b>Samples</b>                   | <b>Crystalline phase</b> | <b>Space group</b> | <b>Lattice parameters</b> |                         |
|----------------------------------|--------------------------|--------------------|---------------------------|-------------------------|
|                                  |                          |                    | <b>a=b=c(Å)</b>           | <b>V(Å<sup>3</sup>)</b> |
| host                             | hexagonal                | <i>R</i> -3(148)   | 8.004                     | 1106.80                 |
| $\text{Mn}^{4+}$                 | hexagonal                | <i>R</i> -3(148)   | 7.991                     | 1099.81                 |
| $\text{Mn}^{4+}, \text{Mg}^{2+}$ | hexagonal                | <i>R</i> -3(148)   | 8.004                     | 1107.02                 |

**Table S5** Important photoelectric parameters of the LED devices under different driving currents (20-350 mA).

| <b>Device</b> | <b>Current (mA)</b> | <b><math>R_a</math></b> | <b><math>T_c</math> (K)</b> | <b>CIE (x,y)</b> | <b><math>R_9</math></b> | <b>Luminous efficiency (lm/W)</b> |
|---------------|---------------------|-------------------------|-----------------------------|------------------|-------------------------|-----------------------------------|
| LED-1         | 20                  | 0                       | 25000                       | (0.1462, 0.0338) | -286                    | 34.99                             |
| LED-2         | 20                  | 64.7                    | 4610                        | (0.3671, 0.4246) | -69                     | 225.62                            |
| LED-3         | 20                  | 89.0                    | 3224                        | (0.4080, 0.3665) | 75                      | 88.41                             |
|               | 40                  | 88.1                    | 3504                        | (0.3915, 0.3540) | 69                      | 83.42                             |
|               | 60                  | 87.3                    | 3728                        | (0.3799, 0.3433) | 68                      | 79.28                             |
|               | 80                  | 86.3                    | 3834                        | (0.3754, 0.3399) | 64                      | 73.78                             |
|               | 100                 | 85.6                    | 4030                        | (0.3672, 0.3314) | 63                      | 68.49                             |
|               | 150                 | 85.1                    | 4322                        | (0.3570, 0.3190) | 65                      | 58.31                             |
|               | 200                 | 84.9                    | 4428                        | (0.3536, 0.3146) | 66                      | 49.06                             |
|               | 250                 | 94.5                    | 4558                        | (0.3503, 0.3112) | 65                      | 40.81                             |
|               | 300                 | 85.5                    | 5695                        | (0.3293, 0.2833) | 90                      | 33.54                             |
|               | 350                 | 80.5                    | 8570                        | (0.3077, 0.2536) | 48                      | 22.17                             |
| LED-4         | 20                  | 87.7                    | 3520                        | (0.4045, 0.3910) | 60                      | 125.89                            |
|               | 40                  | 85.4                    | 3632                        | (0.3987, 0.3886) | 50                      | 123.27                            |
|               | 60                  | 84.0                    | 3710                        | (0.3948, 0.3869) | 44                      | 118.63                            |
|               | 80                  | 83.1                    | 3766                        | (0.3920, 0.3856) | 39                      | 114.31                            |
|               | 100                 | 81.6                    | 3834                        | (0.3888, 0.3837) | 34                      | 109.07                            |
|               | 150                 | 80.0                    | 3964                        | (0.3822, 0.3784) | 25                      | 97.39                             |
|               | 200                 | 78.9                    | 4052                        | (0.3779, 0.3742) | 20                      | 88.54                             |
|               | 250                 | 77.5                    | 4214                        | (0.3706, 0.3673) | 14                      | 80.37                             |
| 300           | 77.8                | 4226                    | (0.3696, 0.3644)            | 16               | 72.19                   |                                   |
| 350           | 80.2                | 4572                    | (0.3549, 0.3413)            | 27               | 58.59                   |                                   |
| LED-5         | 20                  | 81.4                    | 6845                        | (0.2965, 0.3367) | 24                      | 80.47                             |
| LED-6         | 20                  | 82.2                    | 7310                        | (0.3039, 0.3427) | 18                      | 78.86                             |

**Table S6** Important photoelectric parameters of the LED devices under different driving currents (20-350 mA).

| <b>Device</b> | <b>Current (mA)</b> | <b><math>R_a</math></b> | <b><math>T_c</math> (K)</b> | <b>CIE (x,y)</b> | <b><math>R_9</math></b> | <b>Luminous efficiency (lm/W)</b> |
|---------------|---------------------|-------------------------|-----------------------------|------------------|-------------------------|-----------------------------------|
| LED-1'        | 20                  | 0                       | 25000                       | (0.1451, 0.0386) | -254                    | 34.16                             |
| LED-2'        | 20                  | 67.0                    | 4938                        | (0.3514, 0.3984) | -58                     | 214.72                            |
| LED-3'        | 20                  | 89.4                    | 3670                        | (0.3822, 0.3447) | 90                      | 103.47                            |
|               | 40                  | 87.9                    | 4320                        | (0.3560, 0.3141) | 70                      | 102.44                            |
|               | 60                  | 85.9                    | 4856                        | (0.3429, 0.2992) | 59                      | 98.42                             |
|               | 80                  | 83.3                    | 5585                        | (0.3307, 0.2855) | 45                      | 94.69                             |
|               | 100                 | 81.8                    | 6145                        | (0.3240, 0.2773) | 36                      | 90.25                             |
|               | 150                 | 79.6                    | 8810                        | (0.3041, 0.2584) | 30                      | 78.94                             |
|               | 200                 | 75.3                    | 19060                       | (0.2833, 0.2320) | 9                       | 69.99                             |
|               | 250                 | 72.7                    | 22500                       | (0.2834, 0.2264) | -13                     | 68.86                             |
|               | 300                 | 0                       | 25000                       | (0.2615, 0.2039) | 5                       | 53.15                             |
|               | 350                 | 0                       | 25000                       | (0.2641, 0.2034) | -11                     | 51.30                             |
| LED-4'        | 20                  | 88.8                    | 3494                        | (0.3917, 0.3535) | 87                      | 120.40                            |
|               | 40                  | 88.5                    | 3794                        | (0.3764, 0.3391) | 85                      | 121.74                            |
|               | 60                  | 88.9                    | 4022                        | (0.3673, 0.3305) | 85                      | 117.11                            |
|               | 80                  | 89.2                    | 4436                        | (0.3544, 0.3193) | 85                      | 111.42                            |
|               | 100                 | 88.2                    | 4678                        | (0.3481, 0.3132) | 85                      | 105.66                            |
|               | 150                 | 88.4                    | 5590                        | (0.3307, 0.2989) | 89                      | 94.84                             |
|               | 200                 | 87.4                    | 6905                        | (0.3142, 0.2834) | 88                      | 81.86                             |
|               | 250                 | 86.2                    | 7905                        | (0.3063, 0.2730) | 83                      | 76.45                             |
| 300           | 85.0                | 7955                    | (0.3067, 0.2704)            | 74               | 68.40                   |                                   |
| 350           | 84.4                | 9175                    | (0.3000, 0.2618)            | 69               | 62.39                   |                                   |
| LED-5'        | 20                  | 83.9                    | 8215                        | (0.2907, 0.3458) | 44                      | 107.93                            |
| LED-6'        | 20                  | 82.7                    | 7505                        | (0.2811, 0.3373) | 32                      | 105.94                            |
